# Supplementary material
Source: PubMed Central journal article supplement (PMC3293537)

**A**

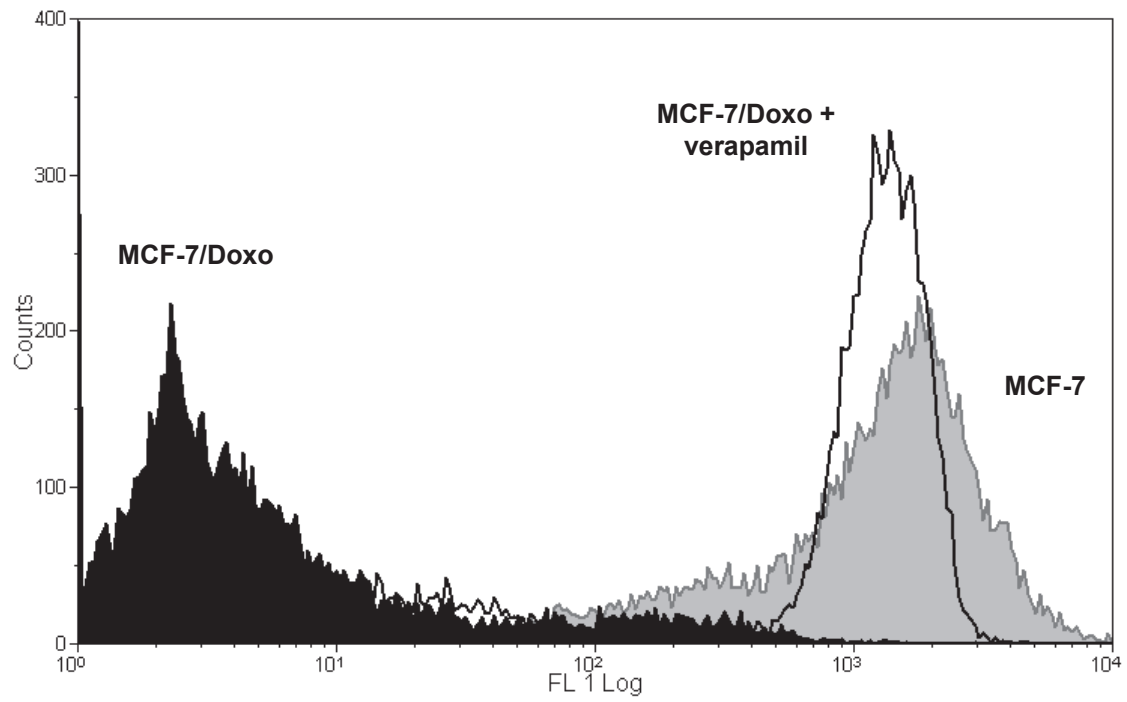

**B**

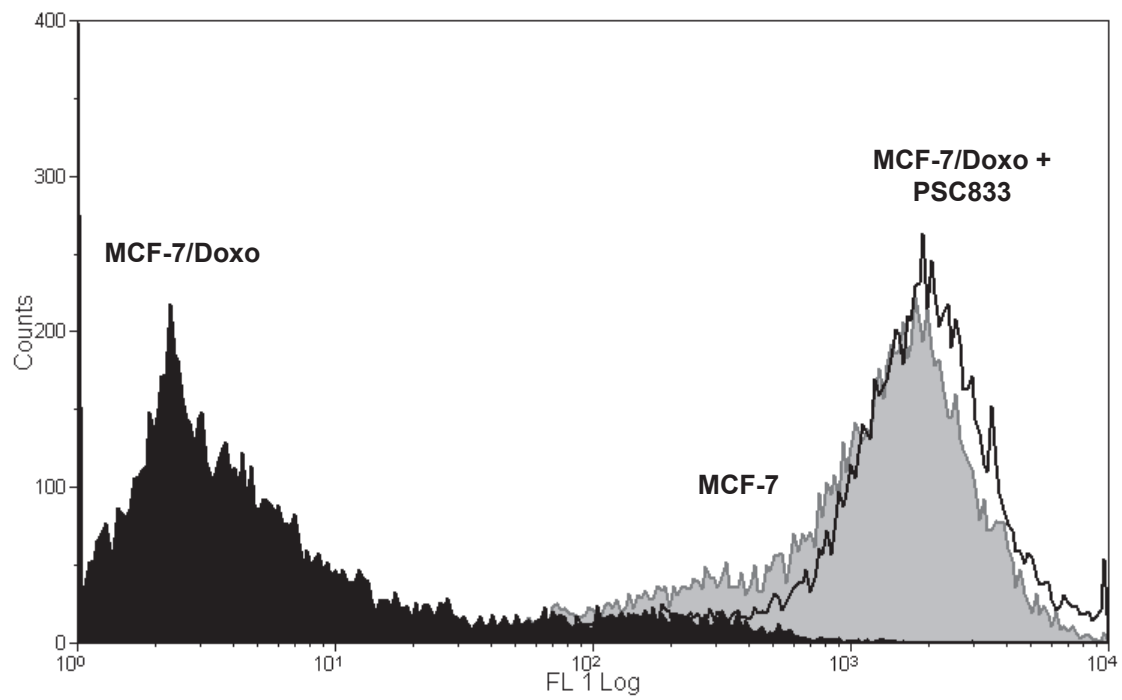

Supporting figure 1

**Calcein efflux is a pure P-gp-driven process in MCF-7/DOXO**

Supplement: supp_M111.312157_jbc.M111.312157-1.pdf [file supp_M111.312157_jbc.M111.312157-1.pdf]
